- Musso M, Weiller C, Kiebel S, Muller SP, Bulau P, Rijntjes M. Training-induced brain-plasticity in aphasia. *Brain* 1999; 122: 1781–90.
- Nielson JM. Agnosia, apraxia, and aphasia. New York: Hoeber; 1946.
- Ohyama M, Senda M, Kitamura S, Ishii K, Mishina M, Terashi A. Role of the nondominant hemisphere and undamaged area during word repetition in poststroke aphasics. A PET activation study. *Stroke* 1996; 27: 897–903.
- Price CJ, Warburton EA, Moore CJ, Frackowiak RSJ, Friston KJ. Dynamic diaschisis: anatomically remote and context-sensitive human brain lesions. *J Cogn Neurosci* 2001; 13: 419–29.
- Raichle ME, Fiez JA, Videen TO, MacLeod AM, Pardo JV, Fox PT, et al. Practice-related changes in human brain functional anatomy during nonmotor learning. *Cereb Cortex* 1994; 4: 8–26.
- Rosen HJ, Petersen SE, Linenweber MR, Snyder AZ, White DA, Chapman L, et al. Neural correlates of recovery from aphasia after damage to left inferior frontal cortex. *Neurology* 2000; 55: 1883–94.
- Seitz R, Azari N, Knorr U, Binkofski F, Herzog H, Freund H-J. The role of diaschisis in stroke recovery. *Stroke* 1999; 30: 1844–50.
- Thiel A, Herholz K, Koyuncu A, Ghaemi M, Kracht LW, Habedank B, et al. Plasticity of language networks in patients with brain tumors: a positron emission tomography activation study. *Ann Neurol* 2001; 50: 620–9.
- Thompson CK, Fix SC, Gitelman DR, Parrish TB, Mesulam MM. fMRI studies of agrammatic sentence comprehension before and after treatment. *Brain Lang* 2000; 74: 387–91.
- Thulborn KR, Carpenter PA, Just MA. Plasticity of language-related brain function during recovery from stroke. *Stroke* 1999; 30: 749–54.
- Warburton E, Swinburn K, Price CJ, Wise RJ. Mechanisms of recovery from aphasia: evidence from positron emission tomographic studies. *J Neurol Neurosurg Psychiatr* 1999; 66: 155–61.
- Weiller C, Isensee C, Rijntjes M, Huber W, Muller S, Bier D. Recovery from Wernicke's aphasia: a positron emission tomographic study. *Ann Neurol* 1995; 37: 723–32.

## Another disorder finds its gene

Siintola *et al.* describe for the first time three patients with a deficiency of the lysosomal aspartyl proteinase cathepsin D (CTSD). In one of these patients, the authors found a mutational inactivation of the cathepsin D gene (CTSD) that encodes CTSD. All the patients described had severe neurological abnormalities at birth including intractable seizures, spasticity, apnoea and microcephaly. This deficiency is proposed as the underlying cause of congenital neuronal ceroid lipofuscinosis (CNCL) (Humphreys *et al.*, 1985; Garborg *et al.*, 1987; Barohn *et al.*, 1992).

Originally described in a sheep model (Tyynela *et al.*, 2000, 2001) and further corroborated by findings in a canine model (Awano *et al.*, 2006), defects in CTSD were considered to be part of the neuronal ceroid lipofuscinoses (NCLs). The ovine model proved to be a feasible tool to study the disease. The affected sheep have a mutation in the active site of CTSD and newborn lambs suffer similar pathological and neurological consequences as seen in the human NCLs. The NCLs encompass a group of lysosomal storage diseases sharing similar clinical features (Goebel *et al.*, 1999; Herva *et al.*, 2000; Santavuori *et al.*, 2000; Weimer *et al.*, 2002; Mole, 2004). Described in the 19th and early 20th century as one disease with a variable age of onset, these diseases are now known to be caused by mutations in six different genes (CLN1–CLN3, CLN5, CLN6 and CLN8) located on different chromosomes (for a review see Mole, 2004). Adult NCL is expected to be caused by mutations in a gene not yet identified (CLN4). The worldwide incidence of the NCLs is 1 : 30 000 live births (Santavuori *et al.*, 2000).

The NCLs present with progressive loss of vision and neurodevelopmental decline, seizures, myoclonic jerks and premature death. The classification of the four major clinical forms is based on the age of onset: infantile (INCL/CLN1), late infantile (LINCL/CLN2), juvenile (JNCL/CLN3) and adult (Kufs disease or ANCL/CLN4). In addition the

NCLs also include three variants of the late infantile form (vLINCLs/CLN5, CLN6 and CLN8) and northern epilepsy (NE/CLN8) which is allelic with one of the vLINCLs (Ranta *et al.*, 2004). Now with the addition of CNCL due to mutation of CTSD the human NCLs currently consist of nine diseases due to mutation in eight genes, seven of which have been identified (Table 1). Little is known about ANCL as it encompasses a more diverse clinical presentation and evolution, and some cases initially classified as ANCL have been later re-classified as variants of lipidosis (Berkovic *et al.*, 1988; Goebel *et al.*, 1999). Although presumed to be caused by mutations in CLN4, lack of the ability to perform accurate diagnosis has been a limiting factor for the identification of this gene.

Now with the addition of CNCL due to mutation of CTSD, the human NCLs currently consist of nine diseases caused by mutations in seven genes, six of which have been identified (Table 1). The common pathological finding is the

**Table 1** The Neuronal Ceroid Lipofuscinoses. Clinical classification, gene affected, and protein designation.

| Disease    | Chromosome location | Gene affected | Protein designation/function     |
|------------|---------------------|---------------|----------------------------------|
| CNCL       | 11p15.5             | CTSD          | Cathepsin D                      |
| INCL       | 1p32                | CLN1          | Palmitoyl protein thioesterase I |
| LINCL      | 11p15               | CLN2          | Tripeptidyl peptidase protein I  |
| JNCL       | 16p12               | CLN3          | Unknown                          |
| ANCL       | Unknown             | CLN4?         | Unknown                          |
| vfinLINCL  | 13q31–32            | CLN5          | Unknown                          |
| vLINCL     | 15q21–23            | CLN6          | Unknown                          |
| vturkLINCL | 8p23                | CLN8          | Unknown                          |
| NE         | 8p23                | CLN8          | Unknown                          |

presence of autofluorescent storage material in the lysosome, which varies in composition amongst the different NCLs (Palmer *et al.*, 1997; Tyynela *et al.*, 1997). Although not completely characterized, it is known that the deposits contained in INCL, LINCL and JNCL include saposins A and D (SAPs), various lipids and other proteins. However, in INCL there is no accumulation of the subunit c of mitochondrial ATP synthase, which has been found in LINCL and JNCL to be a predominant component of the storage material (Palmer *et al.*, 1992). In JNCL, accumulations also show variable amounts of amyloid beta peptide, dolichyl compounds and oligosaccharides. The mechanism(s) responsible for the accumulation of these materials is (are) not completely understood, and their heterogeneity suggests that more than one degradation pathway in the lysosome may be affected. Ultrastructural analyses of the storage material also reveal a different appearance depending on the disease (Palmer *et al.*, 1997; Tyynela *et al.*, 1997; Goebel *et al.*, 1999). Granular osmiophilic deposits (GRODs) are the hallmark for INCL. These aggregates are localized in neurons forming packed structures of nearly 5  $\mu\text{m}$  in size, but can be found in other cell types as well. Curvilinear profiles (CP) are membrane bound bodies present in almost any cell, and are a hallmark of LINCL. Rectilinear complex and fingerprint bodies are present in lesser extent in JNCL and vLINCLs. However, the role that the storage material plays in the pathophysiology of the NCLs has been the focus of debate, and remains elusive.

To date, the only NCL genes whose encoded proteins have a known function are *CLN1* and *CLN2*. *CLN1* encodes palmitoyl protein thioesterase I (PPT1) and *CLN2* encodes the serine protease, tripeptidyl peptidase protein I (TPP1), both of which are soluble lysosomal enzymes (for a review see Lin *et al.*, 2001; Hofmann *et al.*, 2002).

The protein mutated in JNCL, denoted CLN3, is most likely a lysosomal transmembrane protein (for a review see Phillips *et al.*, 2005), which has been associated with different cellular pathways such as arginine transport into the lysosome (Kim *et al.*, 2003; Ramirez-Montealegre and Pearce, 2005), lysosomal vATPase activity and vacuolar pH regulation (Pearce *et al.*, 1999a,b; Ramirez-Montealegre and Pearce, 2005; Padilla-Lopez and Pearce, 2006), and apoptosis (Puranam *et al.*, 1999; Persaud-Sawin *et al.*, 2002). The Finnish variant for the late infantile form is caused by mutations in *CLN5*. It is likely a transmembrane protein, and localizes to the lysosome (Isosomppi *et al.*, 2002). The gene responsible for the vLINCL described in small populations of patients of Spanish, Romany or Portuguese origin was mapped to chromosome 15, and corresponds to *CLN6* (Sharp *et al.*, 1999). Naturally occurring animal models of this disease include the *nclf* mouse model (Bronson *et al.*, 1998) and the South Hampshire sheep model (Broom and Zhou, 2001). Interestingly, as opposed to most of the other CLN-proteins, CLN6 has been localized to the endoplasmic reticulum (Heine *et al.*, 2004; Mole *et al.*, 2004). The Turkish variant of LINCL

(vturkLINCL) has been recently identified as being caused by a mutation in *CLN8* (Ranta *et al.*, 2004), although it was originally classified as being due to mutation in a gene designated as *CLN7*. Northern epilepsy (NE) is caused by mutations in *CLN8* (Tahvanainen *et al.*, 1994). The function of CLN8 is not known; however, it has been localized to the endoplasmic reticulum (Lonka *et al.*, 2000).

CNCL is defined as a rare congenital condition characterized by severe microcephaly, spasticity, neonatal status epilepticus and death within the first days or weeks of life (Humphreys *et al.*, 1985; Garborg *et al.*, 1987; Barohn *et al.*, 1992). Based on clinical findings from reports of affected patients, CNCL was tentatively included as a variant NCL without genetic assignment (Goebel *et al.*, 1999), because evaluation of post-mortem tissue showed the presence of autofluorescent material with similar components to those found in INCL. Owing to the possibility of other severe neonatal conditions that could explain similar clinical signs, differential diagnosis is difficult and includes a large number of fatal metabolic diseases.

Using blood samples from a reported still-alive case of CNCL in a newborn of Pakistani origin, and based on their previous findings in the ovine model, Siintola *et al.* screened *CTSD* using samples obtained from the father and the affected newborn. This family had a previous history of two affected newborns clinically classified as CNCL. These two newborn boys died within the first days of life. Paraffin embedded samples from the two diseased newborns, and samples obtained from a fourth non-related case of British origin, were used for non-genetic analyses.

A search for mutations in the nine exons and adjacent intron/exon boundaries of *CTSD* revealed that the affected newborn had a homozygous single nucleotide duplication in exon 6 that alters the reading frame and causes a premature stop codon at position 255. Similar analysis of the father showed that he is a heterozygous carrier of the same mutation. Although not available for analysis, it is predicted that the mother carries a similar mutation due to consanguinity, as the parents are first cousins. As a consequence of the mutation, the *CTSD* mRNA is probably degraded by the nonsense-mediated mRNA decay system (Maquat, 2004). This likely accounts for the lack of detectable *CTSD* in the patient's tissues studied by immunohistochemistry. It is also possible that if the mRNA survives the normal decay controls, the truncated protein is degraded. The authors were able to express the truncated protein in model systems and found that it had no *CTSD* activity. Thus, it is almost certain that the *CTSD* mutation, and consequent lack of *CTSD* enzyme activity, accounts for the severe disease seen in the Pakistani patient. Further work will reveal if all cases of CNCL are due to mutations in *CTSD*. It is also possible that less damaging mutations in *CTSD*, that allow some residual enzyme activity, may cause CNCL with a later onset and milder presentation.

Neuropathological findings using paraffin embedded samples from the two Pakistani newborns and the British

patient showed absence of CTSD immunostaining, microglial activation, severe neuronal and white matter loss, and presence of storage deposits including SAPs, which were previously described in other CNCL patients. In the samples analysed, Siintola *et al.* report the absence of accumulation of the subunit c of mitochondrial ATP synthase. This finding was also reported in previous cases. The pathological reports presented in the article also resemble results previously obtained from the ovine model.

The findings of Siintola *et al.* strongly support the notion that CNCL is in fact another form of NCL. Their results also show that CNCL is caused by mutations in the gene encoding the lysosomal enzyme CTSD. Their approach nicely demonstrates the value of naturally occurring animal models for investigation of the NCLs. In this particular instance, the animal models pointed towards a likely candidate gene, which seems to be correct for the cases studied. In the absence of the animal models it would have taken much longer to identify the gene responsible for such a rare and hard to diagnose disease. The animal models will also very likely prove to be important in the elucidation of the normal functions of the proteins that are defective in other types of NCL. Furthermore, similar to INCL and LINCL in which lysosomal enzymes are lacking or defective, their findings suggest that common cellular pathways involving the proper lysosomal degradation of proteins and lipids are affected in the different NCLs. This could explain common features present in a set of diseases that are quite diverse with respect to the causative gene, composition of the storage material and severity (Table 1).

Denia Ramirez-Montealegre,<sup>1</sup> Paul G. Rothberg<sup>4</sup> and David A. Pearce<sup>1,2,3</sup>

<sup>1</sup>Center for Aging and Developmental Biology, Aab Institute of Biomedical Sciences,

<sup>2</sup>Department of Biochemistry and Biophysics,

<sup>3</sup>Department of Neurology and

<sup>4</sup>Department of Pathology and Laboratory Medicine, University of Rochester School of Medicine and Dentistry, Rochester, NY 14642, USA

E-mail: david\_pearce@urmc.rochester.edu

doi:10.1093/brain/awl132

## References

- Awano T, Katz ML, O'Brien DP, Taylor JF, Evans J, Khan S, et al. A mutation in the cathepsin D gene (CTSD) in American bulldogs with neuronal ceroid lipofuscinosis. *Mol Genet Metab* 2006; 87: 341–8.
- Barohn RJ, Dowd DC, Kagan-Hallet KS. Congenital ceroid-lipofuscinosis. *Pediatr Neurol* 1992; 8: 54–9.
- Berkovic SF, Carpenter S, Andermann F, Andermann E, Wolfe LS. Kufs' disease: a critical reappraisal. *Brain* 1988; 111: 27–62.
- Bronson RT, Donahue LR, Johnson KR, Tanner A, Lane PW, Faust JR. Neuronal ceroid lipofuscinosis (nclf), a new disorder of the mouse linked to chromosome 9. *Am J Med Genet* 1998; 77: 289–97.
- Broom MF, Zhou C. Fine mapping of ovine ceroid lipofuscinosis confirms orthology with CLN6. *Eur J Paediatr Neurol* 2001; 5 Suppl A: 33–6.
- Garborg I, Torvik A, Hals J, Tangsrud SE, Lindemann R. Congenital neuronal ceroid lipofuscinosis. A case report. *Acta Pathol Microbiol Immunol Scand A* 1987; 95: 119–25.
- Goebel HH, Mole SE, Lake BD. The neuronal ceroid lipofuscinoses (Batten disease). Amsterdam, Netherlands: IOS Press; 1999.
- Heine C, Koch B, Storch S, Kohlschutter A, Palmer DN, Braulke T. Defective endoplasmic reticulum-resident membrane protein CLN6 affects lysosomal degradation of endocytosed arylsulfatase A. *J Biol Chem* 2004; 279: 22347–52.
- Herva R, Tynnela J, Hirvasniemi A, Syrjakallio-Ylitalo M, Haltia M. Northern epilepsy: a novel form of neuronal ceroid-lipofuscinosis. *Brain Pathol* 2000; 10: 215–22.
- Hofmann SL, Atashband A, Cho SK, Das AK, Gupta P, Lu JY. Neuronal ceroid lipofuscinoses caused by defects in soluble lysosomal enzymes (CLN1 and CLN2). *Curr Mol Med* 2002; 2: 423–37.
- Humphreys S, Lake BD, Scholtz CL. Congenital amaurotic idiocy—a pathological, histochemical, biochemical, and ultrastructural study. *Neuropathol Appl Neurobiol* 1985; 11: 475–84.
- Isosomppi J, Vesa J, Jalanko A, Peltonen L. Lysosomal localization of the neuronal ceroid lipofuscinosis CLN5 protein. *Hum Mol Genet* 2002; 11: 885–91.
- Kim Y, Ramirez-Montealegre D, Pearce DA. A role in vacuolar arginine transport for yeast Btn1p and for human CLN3, the protein defective in Batten disease. *Proc Natl Acad Sci USA* 2003; 100: 15458–62.
- Lin L, Sohar I, Lackland H, Lobel P. The human CLN2 protein/tripeptidyl-peptidase I is a serine protease that autoactivates at acidic pH. *J Biol Chem* 2001; 276: 2249–55.
- Lonka L, Kytälä A, Ranta S, Jalanko A, Lehesjoki AE. The neuronal ceroid lipofuscinosis CLN8 membrane protein is a resident of the endoplasmic reticulum. *Hum Mol Genet* 2000; 9: 1691–7.
- Maquat LE. Nonsense-mediated mRNA decay: splicing, translation and mRNP dynamics. *Nat Rev Mol Cell Biol* 2004; 5: 89–99.
- Mole SE. The genetic spectrum of human neuronal ceroid-lipofuscinoses. *Brain Pathol* 2004; 14: 70–6.
- Mole SE, Michaux G, Codlin S, Wheeler RB, Sharp JD, Cutler DF. CLN6, which is associated with a lysosomal storage disease, is an endoplasmic reticulum protein. *Exp Cell Res* 2004; 298: 399–406.
- Padilla-Lopez S, Pearce DA. *Saccharomyces cerevisiae* lacking Btn1p modulate vacuolar ATPase activity to regulate pH imbalance in the vacuole. *J Biol Chem* 2006; 281: 10273–80.
- Palmer DN, Fearnley IM, Walker JE, Hall NA, Lake BD, Wolfe LS, et al. Mitochondrial ATP synthase subunit c storage in the ceroid-lipofuscinoses (Batten disease). *Am J Med Genet* 1992; 42: 561–7.
- Palmer DN, Jolly RD, van Mil HC, Tynnela J, Westlake VJ. Different patterns of hydrophobic protein storage in different forms of neuronal ceroid lipofuscinosis (NCL, Batten disease). *Neuropediatrics* 1997; 28: 45–8.
- Pearce DA, Ferea T, Nosel SA, Das B, Sherman F. Action of BTN1, the yeast orthologue of the gene mutated in Batten disease. *Nat Genet* 1999a; 22: 55–8.
- Pearce DA, Nosel SA, Sherman F. Studies of pH regulation by Btn1p, the yeast homolog of human Cln3p. *Mol Genet Metab* 1999b; 66: 320–3.
- Persaud-Sawin DA, VanDongen A, Boustany RM. Motifs within the CLN3 protein: modulation of cell growth rates and apoptosis. *Hum Mol Genet* 2002; 11: 2129–42.
- Phillips SN, Benedict JW, Weimer JM, Pearce DA. CLN3, the protein associated with batten disease: structure, function and localization. *J Neurosci Res* 2005; 79: 573–83.
- Puranam KL, Guo WX, Qian WH, Nikbakht K, Boustany RM. CLN3 defines a novel antiapoptotic pathway operative in neurodegeneration and mediated by ceramide. *Mol Genet Metab* 1999; 66: 294–308.
- Ramirez-Montealegre D, Pearce DA. Defective lysosomal arginine transport in juvenile Batten disease. *Hum Mol Genet* 2005; 14: 3759–73.

- Ranta S, Topcu M, Tegelberg S, Tan H, Ustubutun A, Saatci I, et al. Variant late infantile neuronal ceroid lipofuscinosis in a subset of Turkish patients is allelic to Northern epilepsy. *Hum Mutat* 2004; 23: 300–5.
- Santavuori P, Lauronen L, Kirveskari K, Aberg L, Sainio K. Neuronal ceroid lipofuscinoses in childhood. *Suppl Clin Neurophysiol* 2000; 53: 443–51.
- Sharp JD, Wheeler RB, Lake BD, Fox M, Gardiner RM, Williams RE. Genetic and physical mapping of the CLN6 gene on chromosome 15q21-23. *Mol Genet Metab* 1999; 66: 329–31.
- Tahvanainen E, Ranta S, Hirvasniemi A, Karila E, Leisti J, Sistonen P, et al. The gene for a recessively inherited human childhood progressive epilepsy with mental retardation maps to the distal short arm of chromosome 8. *Proc Natl Acad Sci USA* 1994; 91: 7267–70.
- Tyynela J, Suopanki J, Baumann M, Haltia M. Sphingolipid activator proteins (SAPs) in neuronal ceroid lipofuscinoses (NCL). *Neuropediatrics* 1997; 28: 49–52.
- Tyynela J, Sohar I, Sleat DE, Gin RM, Donnelly RJ, Baumann M, et al. A mutation in the ovine cathepsin D gene causes a congenital lysosomal storage disease with profound neurodegeneration. *EMBO J* 2000; 19: 2786–92.
- Tyynela J, Sohar I, Sleat DE, Gin RM, Donnelly RJ, Baumann M, et al. Congenital ovine neuronal ceroid lipofuscinosis—a cathepsin D deficiency with increased levels of the inactive enzyme. *Eur J Paediatr Neurol* 2001; 5 Suppl A: 43–5.
- Weimer JM, Kriscenski-Perry E, Elshatory Y, Pearce DA. The neuronal ceroid lipofuscinoses: mutations in different proteins result in similar disease. *Neuromolecular Med* 2002; 1: 111–24.
